# Supplementary material
Source: PubMed Central journal article supplement (PMC1635074)

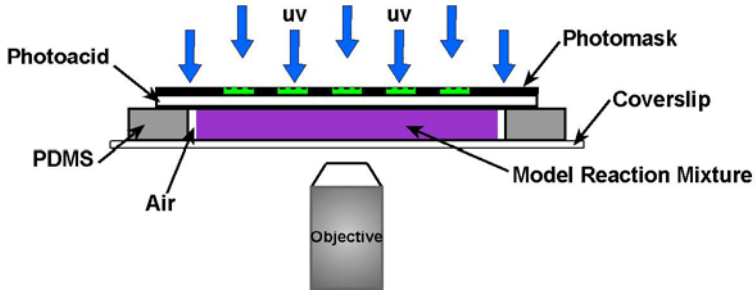

Supplement: pnas_0605560103_1.pdf [file pnas_0605560103_1.pdf]

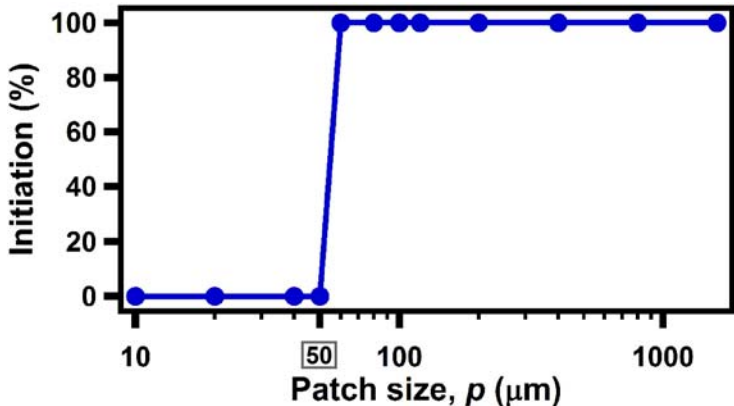

Supplement: pnas_0605560103_3.pdf [file pnas_0605560103_3.pdf]

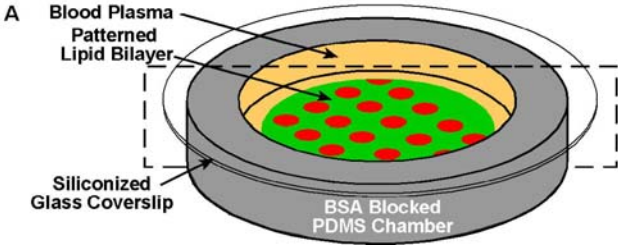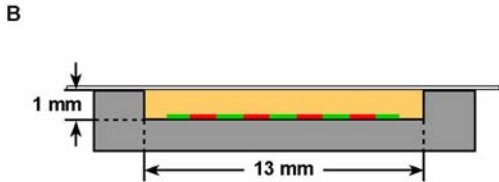

Supplement: pnas_0605560103_4.pdf [file pnas_0605560103_4.pdf]

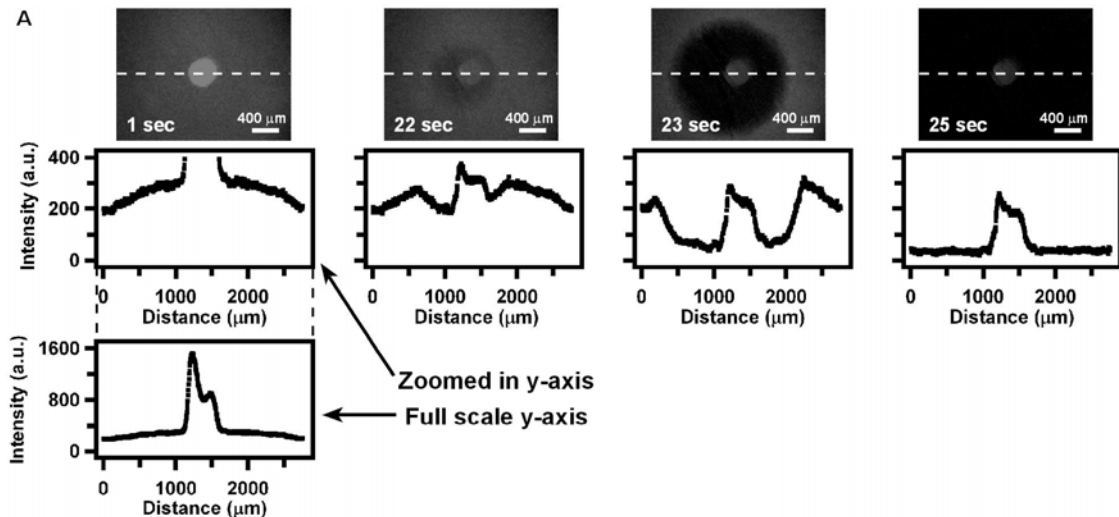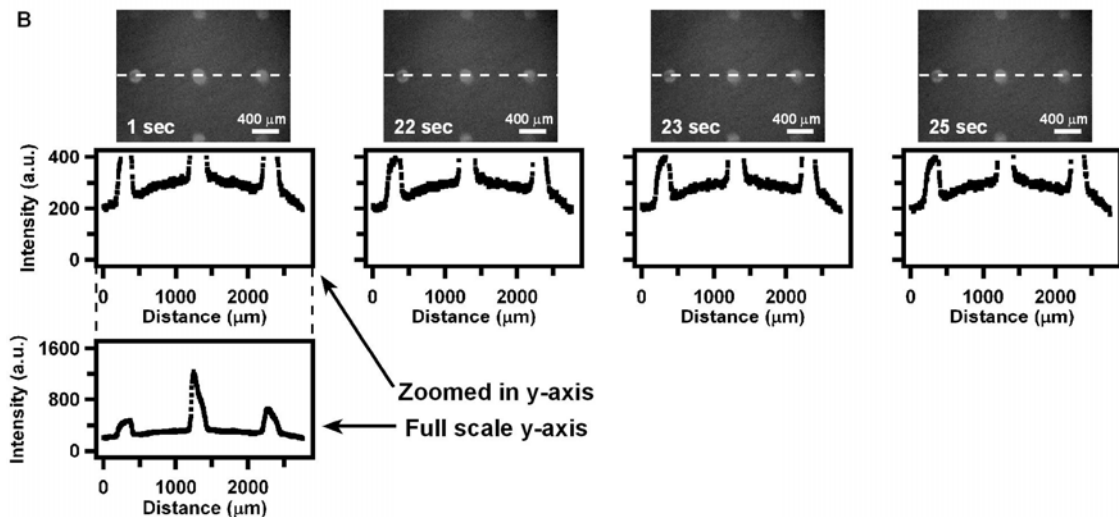

Supplement: pnas_0605560103_6.pdf [file pnas_0605560103_6.pdf]

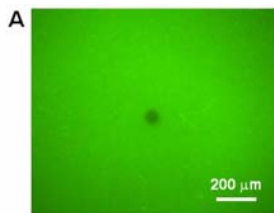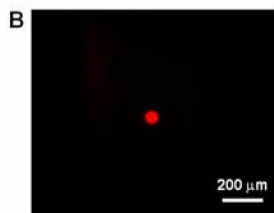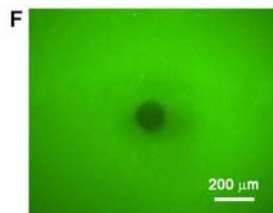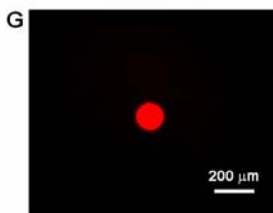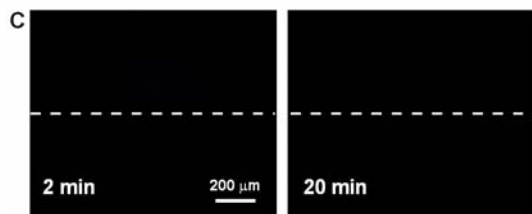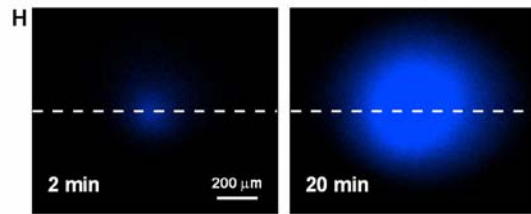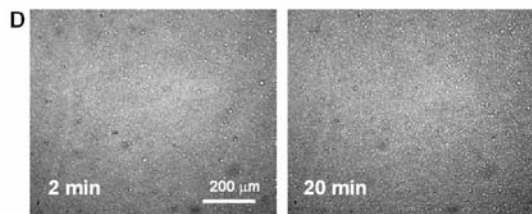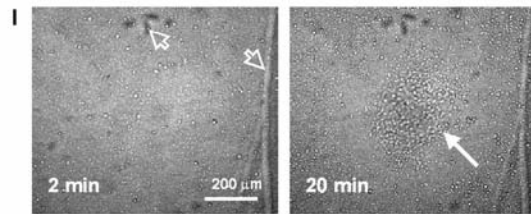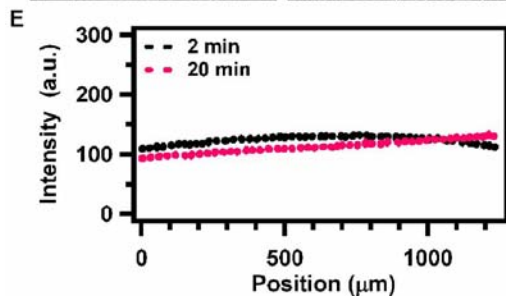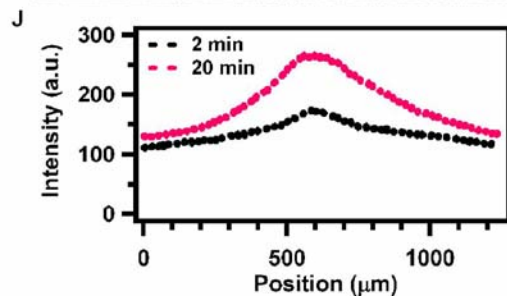

Supplement: pnas_0605560103_7.pdf [file pnas_0605560103_7.pdf]

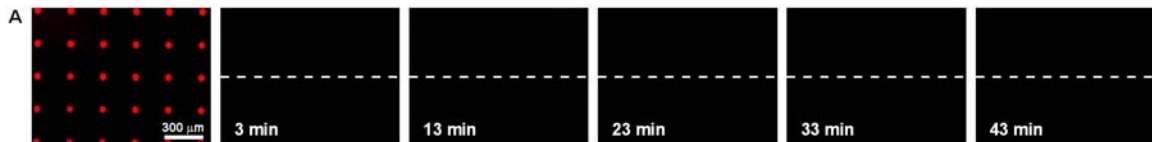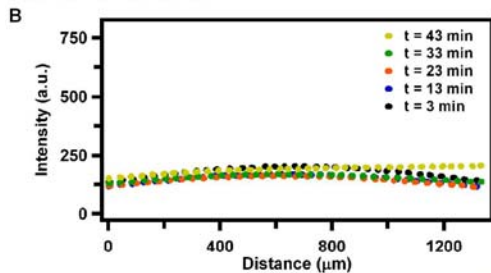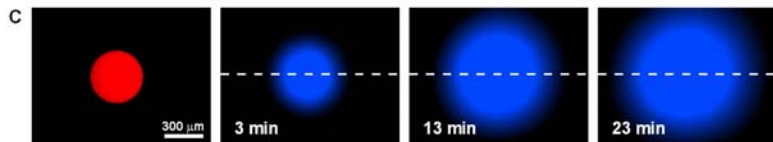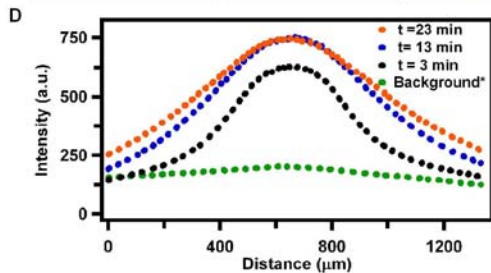

Supplement: pnas_0605560103_8.pdf [file pnas_0605560103_8.pdf]
